# Supplementary material
Source: Springer Nature journal article supplement (https://www.springermedizin.de/resource/supplementary/12885_2012_3476_MOESM2_ESM.pdf/9463768)

**A**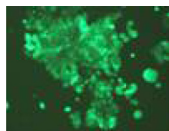

XXXXXXXXXXXXXXXXX – n/s ctrl

gccgtaaactgctttgtg – E#2

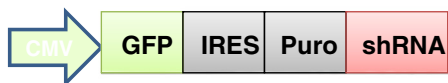**B**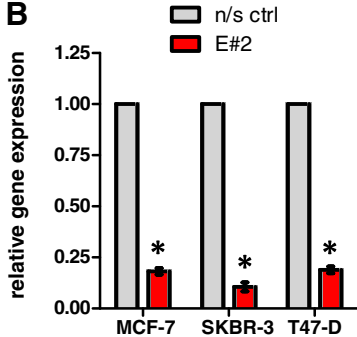**C**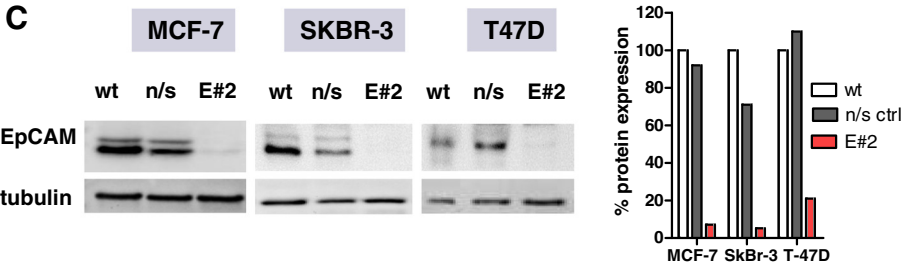**D**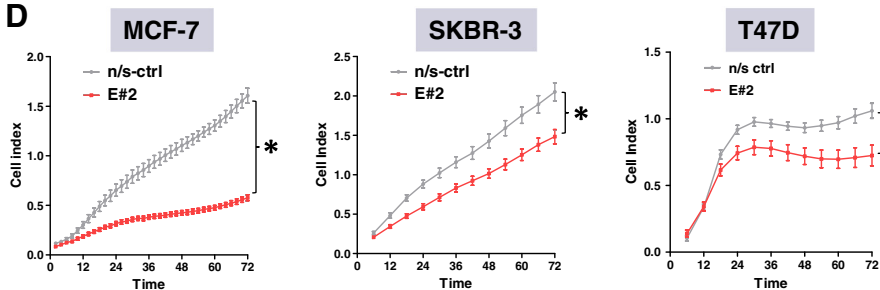**E**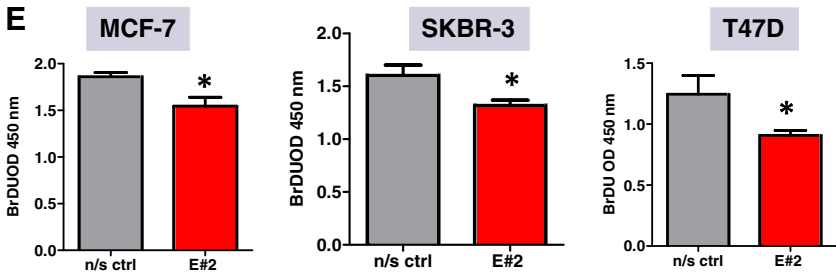

Supplement: MOESM2 [file 9463768]
